# Supplementary material
Source: PubMed Central journal article supplement (PMC10174641)

**Note to readers with disabilities:** *EHP* strives to ensure that all journal content is accessible to all readers. However, some figures and Supplemental Material published in *EHP* articles may not conform to [508 standards](#) due to the complexity of the information being presented. If you need assistance accessing journal content, please contact [ehp508@niehs.nih.gov](mailto:ehp508@niehs.nih.gov). Our staff will work with you to assess and meet your accessibility needs within 3 working days.

### **Supplemental Material**

#### **Long-Term Exposure to Ambient Air Pollution and Mortality among Four Million COVID-19 Cases in Italy: The EpiCovAir Study**

Massimo Stafoggia, Andrea Ranzi, Carla Ancona, Lisa Bauleo, Antonino Bella, Giorgio Cattani, Federica Nobile, Patrizio Pezzotti, Ivano Iavarone, and the EpiCovAir Study Group

#### **Table of Contents**

##### **The EpiCovAir Study Group**

**Table S1.** Municipality-specific variables on: characteristics of the area, population, mobility, socio-economic and health status, and healthcare offer.

**Table S2.** Effect of air pollutants on mortality with inclusion of healthcare professionals, main approach and sensitivity analyses: percent increase in mortality risk (%IR), and 95% Confidence Intervals (95% CI) per 1  $\mu\text{g}/\text{m}^3$  increment in air pollutants. Italy, February 20, 2020 – June 15, 2021 (n=4,126,189 COVID-19 cases, n=124,522 deaths).

**Table S3.** Effect of air pollutants on hospitalizations, main approach and sensitivity analyses: percent increases of risk (%IR), and 95% Confidence Intervals (95% CI), per 1  $\mu\text{g}/\text{m}^3$  increment in air pollutants. Italy, February 20, 2020 – June 15, 2021 (n=3,995,202 COVID-19 cases, n=391,329 hospitalizations).

**Table S4.** Effect of air pollutants on usage of intensive care units (ICU), main approach and sensitivity analyses: percent increases of risk (%IR), and 95% Confidence Intervals (95% CI), per 1  $\mu\text{g}/\text{m}^3$  increments in air pollutants. Italy, February 20, 2020 – June 15, 2021 (n=3,995,202 COVID-19 cases, n=54,699 accesses to intensive care units).

**Table S5.** Effect of air pollutants on mortality in the three different waves of the COVID-19 pandemic, by individual-level covariates and geographical area: percent increases of risk (%IR), and 95% Confidence Intervals (95% CI), per 1  $\mu\text{g}/\text{m}^3$  increment in air pollutants. Italy, February 20, 2020 – June 15, 2021 (first wave: n=201,210 COVID-19 cases, n=35,440 deaths; second wave: n=1,534,950 COVID-19 cases, n=41,620 deaths; third wave: n=2,259,042 COVID-19 cases, n=47,286 deaths). Results from the main model, adjusted for interaction terms between month, province, age, sex, and ventiles of the generalized propensity score.

**Table S6.** Results of the two-pollutant models: percent increases of risk (%IR), and 95% Confidence Intervals (95% CI), per 1  $\mu\text{g}/\text{m}^3$  increment in air pollutants. Italy, February 20, 2020 – June 15, 2021 (n=3,995,202 COVID-19 cases, n=124,346 deaths). Results from the main model, adjusted for interaction terms between month, province, age, sex, and ventiles of the generalized propensity score.

**Figure S1.** Flow-chart of data selection.

**Figure S2.** Map of COVID-19 case-fatality rates by municipality in the three different pandemic waves: 20/02/2020 – 31/05/2020, 15/09/2020 – 15/12/2020 and 16/12/2020 – 15/06/2021.

**Figure S3.** Map of COVID-19 hospitalization rates (left) and usage of intensive care units (ICU) rates (right) by municipality, Italy 20/02/2020 – 31/05/2020 and 15/09/2020 – 15/06/2021.

**Figure S4.** Map of air pollution levels (mean 2016-2019) by municipality in Italy.

**Figure S5.** Generalized Propensity Score (GPS) based on 4 selected principal components (PC): distribution of GPS by quintiles of exposure (positivity assumption (left) and absolute correlation between exposure and covariates pre- and post-GPS (balancing plot, right). Relevant data on mean absolute correlations in Excel Table S3.

**Figure S6.** Generalized Propensity Score (GPS) based on all 12 principal components (PC): distribution of GPS by quintiles of exposure (positivity assumption (left) and absolute correlation between exposure and covariates pre- and post-GPS (balancing plot, right). Relevant data on mean absolute correlations in Excel Table S4.

**Figure S7.** Generalized Propensity Score (GPS) based on selected contextual variables: distribution of GPS by quintiles of exposure (positivity assumption (left) and absolute correlation between exposure and covariates pre- and post-GPS (balancing plot, right). Relevant data on mean absolute correlations in Excel Table S5.

**Additional File-** Excel Document

## **The EpiCovAir Study Group**

Carla Ancona, Department of Epidemiology, Lazio Regional Health Service, ASL Roma 1, Rome, Italy  
Xanthi Andrianou, National Institute of Health (ISS), Rome, Italy  
Domenico Avenoso, Regional Agency for Environmental Prevention of Liguria, Genova, Italy  
Marco Baldini, Regional Agency for Environmental Prevention of Marche, Ancona, Italy  
Fabiano Barbiero, Regional Agency for Environmental Prevention of F.V.G., Udine, Italy  
Lisa Bauleo, Department of Epidemiology, Lazio Regional Health Service, ASL Roma 1, Rome, Italy  
Antonino Bella, National Institute of Health (ISS), Rome, Italy  
Giorgio Cattani, Italian Institute for Environmental Protection and Research, Rome, Italy  
Katuscia Di Biagio, Regional Agency for Environmental Prevention of Marche, Ancona, Italy  
Alessandro Di Giosa, Regional Agency for Environmental Prevention of Lazio, Rome, Italy  
Giovanni Finocchiaro, Italian Institute for Environmental Protection and Research, Rome, Italy  
Simonetta Fuser, Regional Agency for Environmental Prevention of Veneto, Udine, Italy  
Roberta Gagliardi, National Institute of Health (ISS), Rome, Italy  
Alessandra Galosi, Italian Institute for Environmental Protection and Research, Rome, Italy  
Simone Giannini, Regional Agency for Environmental Prevention of Emilia-Romagna, Modena, Italy  
Marco Giustini, National Institute of Health (ISS), Rome, Italy  
Giorgio Guzzetta, Fondazione Bruno Kessler, Trento, Italy  
Ivano Iavarone, National Institute of Health (ISS), Rome, Italy  
Alberto Mateo Urdiales, National Institute of Health (ISS), Rome, Italy  
Giada Minelli, National Institute of Health (ISS), Rome, Italy  
Fabrizio Minichilli, Institute of Clinical Physiology, National Council of Research, Pisa, Italy  
Giovenale Moirano, University of Turin, and CPO Piemonte, AOU Città della Salute e della Scienza, Turin, Italy  
Mauro Mussin, Regional Agency for Environmental Prevention of Lombardia, Milan, Italy  
Anna Maria Nannavecchia, Health Regional Agency of Apulia (AReSS), Bari, Italy  
Federica Nobile, Department of Epidemiology, Lazio Regional Health Service, ASL Roma 1, Rome, Italy  
Roberto Pasetto, National Institute of Health (ISS), Rome, Italy  
Tiziano Pastore, Regional Agency for Environmental Prevention of Puglia, Bari, Italy  
Patrizio Pezzotti, National Institute of Health (ISS), Rome, Italy  
Andrea Ranzi, Regional Agency for Environmental Prevention of Emilia-Romagna, Modena, Italy  
Lorenzo Richiardi, University of Turin, and CPO Piemonte, AOU Città della Salute e della Scienza, Turin, Italy  
Maria Serinelli, Regional Agency for Environmental Prevention of Puglia, Bari, Italy  
Eleonora Soggiu, National Institute of Health (ISS), Rome, Italy  
Massimo Stafoggia, Department of Epidemiology, Lazio Regional Health Service, ASL Roma 1, Rome, Italy  
Michele Stortini, Regional Agency for Environmental Prevention of Emilia-Romagna, Bologna, Italy  
Maria Fenicia Vescio, National Institute of Health (ISS), Rome, Italy

**Table S1.** Municipality-specific variables on: characteristics of the area, population, mobility, socio-economic and health status, and healthcare offer

| Category                     | Variable         | Source        | Year                    | Description                                                                                                     |
|------------------------------|------------------|---------------|-------------------------|-----------------------------------------------------------------------------------------------------------------|
| Municipality characteristics | Code             | ISTAT         | 2020                    | ISTAT code of the municipality                                                                                  |
|                              | Name             | ISTAT         | 2020                    | Name of the municipality                                                                                        |
|                              | Province         | ISTAT         | 2020                    | ISTAT code of the province                                                                                      |
|                              | Region           | ISTAT         | 2020                    | ISTAT code of the region                                                                                        |
|                              | Area             | ISTAT         | 2020                    | Size (km2)                                                                                                      |
|                              | Elevation        | ISTAT         | 2020                    | Elevation (m)                                                                                                   |
|                              | Altimetric zone  | ISTAT         | 2020                    | 1 = Inland mountains; 2 = Coastal mountains; 3 = Inland hills; 4 = Coastal hills; 5 = Plane                     |
|                              | Coastal          | ISTAT         | 2020                    | Municipality on the coast (yes/no)                                                                              |
|                              | Island           | ISTAT         | 2020                    | Municipality on an island (yes/no)                                                                              |
|                              | Urbanization     | ISTAT         | 2018                    | 1 = Major city; 2 = Minor city; 3 = Sub-urban or rural area                                                     |
|                              | Longitude        | ISTAT         | 2020                    | Longitude                                                                                                       |
|                              | Latitude         | ISTAT         | 2020                    | Latitude                                                                                                        |
| Population                   | Pop 2011         | ISTAT         | 2011                    | Resident population, Oct 9 2011 (Census date)                                                                   |
|                              | Pop 2019         | ISTAT         | 2019                    | Resident population, Dec 31 2019                                                                                |
|                              | Pop class        | ISTAT         | 2020                    | Population size, in classes: 1=<2.000; 2=2.000-10.000; 3=10.000-50.000, 4=>50.000                               |
|                              | Pop density      | ISTAT         | 2019                    | Population density (pop.2019 / size of the area)                                                                |
|                              | % over 65 years  | ISTAT         | 2020                    | % pop over 65 years                                                                                             |
| Mobility                     | attraction_index | ISTAT         | 2014-2015               | Ratio between movements of individuals who work or study in the municipality, and total individuals in the area |
|                              | self-containment | ISTAT         | 2014-2015               | Ratio between individuals who work or study in the municipality, and total movements in the area                |
|                              | movements_2019   | ASSAEROPORTI  | 2019                    | Number of flights, average 2019                                                                                 |
|                              | passengers_2019  | ASSAEROPORTI  | 2019                    | Number of passengers, average 2019                                                                              |
|                              | movements_2020   | ASSAEROPORTI  | 2020                    | Number of flights at January 2020                                                                               |
|                              | passengers_2020  | ASSAEROPORTI  | 2020                    | Number of passengers at January 2020                                                                            |
|                              | movements_out    | ISTAT         | 2011                    | Number of individuals who move outboud the municipality for work or study reasons                               |
|                              | movements_in     | ISTAT         | 2011                    | Number of individuals who move inside the municipality for work or study reasons                                |
|                              | movements_tot    | ISTAT         | 2011                    | Number of individuals who move for work or study reasons                                                        |
|                              | SLL_index        | ISTAT         | 2020                    | Code of Local Work System (Sistema Locale del Lavoro, SLL)                                                      |
|                              | train_stations   | OpenStreetMap | 2016                    | Presence of a rail station (yes/no)                                                                             |
| stations_number              | OpenStreetMap    | 2016          | Number of rail stations |                                                                                                                 |

|                                     |                 |             |           |                                                                       |
|-------------------------------------|-----------------|-------------|-----------|-----------------------------------------------------------------------|
|                                     | airport_30km    | ISTAT       | 2015      | Number of airports within 30-km buffer                                |
| Socio-economic<br>and health status | income_14_15    | ISTAT       | 2014-2015 | Ratio between gross income and number of households components (euro) |
|                                     | entrepren_14_15 | ISTAT       | 2014-2015 | Number of enterprises, per 1000 inhabitants                           |
|                                     | SEP             | ISS         | 2011      | Socio-Economic Deprivation index, continuous                          |
|                                     | SEP_quintiles   | ISS         | 2011      | Socio-Economic Deprivation index, in quintiles                        |
|                                     | cvd_hosp_rate   | ISS-ISTAT   | 2013-2018 | Cardiovascular hospitalization rate (average 2013-2018, per 100)      |
|                                     | resp_hosp_rate  | ISS-ISTAT   | 2013-2018 | Respiratory hospitalization rate (average 2013-2018, per 100)         |
|                                     | all_hosp_rate   | ISS-ISTAT   | 2013-2018 | All-cause hospitalization rate (average 2013-2018, per 100)           |
|                                     | cvd_mort_rate   | ISS-ISTAT   | 2013-2017 | Cardiovascular mortality rate (average 2013-2017, per 100)            |
|                                     | resp_mort_rate  | ISS-ISTAT   | 2013-2017 | Respiratory mortality rate (average 2013-2017, per 100)               |
|                                     | all_mort_rate   | ISS-ISTAT   | 2013-2017 | All-cause mortality rate (average 2013-2017, per 100)                 |
| Healthcare offer                    | n_hosp          | Min. Health | 2019      | Number of hospitals                                                   |
|                                     | n_nursing       | Min. Health | 2019      | Number of nursing homes                                               |
|                                     | beds_ordinary   | Min. Health | 2019      | Number of beds in ordinary regimen wards                              |
|                                     | beds_dh         | Min. Health | 2019      | Number of beds in day-hospital wards                                  |
|                                     | beds_longstay   | Min. Health | 2019      | Number of beds in long-stay wards                                     |
|                                     | beds_rehab      | Min. Health | 2019      | Number of beds in rehabilitation wards                                |
|                                     | beds_icu        | Min. Health | 2019      | Number of beds in Intensive Care Units                                |
|                                     | n_er            | Min. Health | 2019      | Number of Emergency Rooms                                             |
|                                     | dist_hosp       | Min. Health | 2019      | Distance (m) from closest hospital                                    |
|                                     | dist_nursing    | Min. Health | 2019      | Distance (m) from closest nursing home                                |
|                                     | dist_covid      | Min. Health | 2019      | Distance (m) from closest COVID center                                |
|                                     | dist_er         | Min. Health | 2019      | Distance (m) from closest Emergency Room                              |
|                                     | n_hca           | ISPRA       | 2017      | Number of healthcare residences                                       |
|                                     | workers_hca     | ISPRA       | 2017      | Average number workers in healthcare residences                       |

**Table S2.** Effect of air pollutants on mortality with inclusion of healthcare professionals, main approach and sensitivity analyses: percent increase in mortality risk (%IR), and 95% Confidence Intervals (95% CI) per 1  $\mu\text{g}/\text{m}^3$  increment in air pollutants. Italy, February 20, 2020 – June 15, 2021 (n=4,126,189 COVID-19 cases, n=124,522 deaths)

| Model     | Description                                       | PM <sub>2.5</sub> |        |     | PM <sub>10</sub> |        |     | NO <sub>2</sub> |        |     |
|-----------|---------------------------------------------------|-------------------|--------|-----|------------------|--------|-----|-----------------|--------|-----|
|           |                                                   | %IR               | 95% CI |     | %IR              | 95% CI |     | %IR             | 95% CI |     |
|           | <u>Increasing adjustment levels</u>               |                   |        |     |                  |        |     |                 |        |     |
| M1        | Crude                                             | 3.1               | 2.9    | 3.3 | 2.2              | 2.1    | 2.4 | 2.4             | 2.2    | 2.5 |
| M2        | M1 + province                                     | 1.8               | 1.4    | 2.2 | 1.5              | 1.2    | 1.7 | 2.6             | 2.5    | 2.8 |
| M3        | M2 + month                                        | 1.6               | 1.2    | 2.1 | 1.3              | 1.0    | 1.6 | 2.4             | 2.2    | 2.5 |
| M4        | M3 + age                                          | 0.9               | 0.6    | 1.2 | 0.7              | 0.5    | 0.9 | 0.5             | 0.4    | 0.6 |
| M5        | M4 + sex                                          | 1.0               | 0.7    | 1.2 | 0.7              | 0.5    | 0.9 | 0.5             | 0.4    | 0.6 |
| <b>M6</b> | <b>Main model: M5 + GPS (matched on ventiles)</b> | 0.7               | 0.5    | 0.9 | 0.3              | 0.2    | 0.5 | 0.6             | 0.5    | 0.7 |
|           | <u>Sensitivity models</u>                         |                   |        |     |                  |        |     |                 |        |     |
| M7        | M5 + GPS (linear term)                            | 1.0               | 0.7    | 1.2 | 0.7              | 0.5    | 0.9 | 0.5             | 0.4    | 0.6 |
| M8        | M5 + 4 CPs added as covariates                    | 1.3               | 1.0    | 1.6 | 1.0              | 0.8    | 1.2 | 0.8             | 0.6    | 0.9 |
| M9        | M5 + GPS (inverse weights)                        | 1.3               | 1.0    | 1.5 | 1.0              | 0.8    | 1.1 | 0.7             | 0.5    | 0.8 |
| M10       | M5 + GPS (matched on percentiles)                 | 1.0               | 0.7    | 1.3 | 0.6              | 0.4    | 0.7 | 0.4             | 0.2    | 0.6 |
| M11       | M5 + GPS (matched on deciles)                     | 0.6               | 0.3    | 0.8 | 0.6              | 0.4    | 0.7 | 0.7             | 0.6    | 0.8 |
| M12       | M5 + alternative GPS #1                           | 1.3               | 1.0    | 1.5 | 0.6              | 0.4    | 0.7 | 0.9             | 0.8    | 1.0 |
| M13       | M5 + alternative GPS #2                           | 1.0               | 0.8    | 1.2 | 0.8              | 0.6    | 0.9 | 0.9             | 0.8    | 1.0 |

**Table S3.** Effect of air pollutants on hospitalizations, main approach and sensitivity analyses: percent increases of risk (%IR), and 95% Confidence Intervals (95% CI), per 1  $\mu\text{g}/\text{m}^3$  increment in air pollutants. Italy, February 20, 2020 – June 15, 2021 (n=3,995,202 COVID-19 cases, n=391,329 hospitalizations)

| Model                               | Description                                       | PM <sub>2.5</sub> |            |            | PM <sub>10</sub> |            |            | NO <sub>2</sub> |            |            |
|-------------------------------------|---------------------------------------------------|-------------------|------------|------------|------------------|------------|------------|-----------------|------------|------------|
|                                     |                                                   | %IR               | 95% CI     |            | %IR              | 95% CI     |            | %IR             | 95% CI     |            |
| <u>Increasing adjustment levels</u> |                                                   |                   |            |            |                  |            |            |                 |            |            |
| M1                                  | Crude                                             | 5.1               | 5.0        | 5.2        | 3.7              | 3.6        | 3.7        | 3.2             | 3.2        | 3.3        |
| M2                                  | M1 + province                                     | 1.7               | 1.5        | 1.9        | 1.4              | 1.3        | 1.5        | 2.3             | 2.2        | 2.4        |
| M3                                  | M2 + month                                        | 1.5               | 1.3        | 1.7        | 1.2              | 1.1        | 1.4        | 1.9             | 1.8        | 2.0        |
| M4                                  | M3 + age                                          | 0.7               | 0.5        | 0.9        | 0.6              | 0.5        | 0.7        | 0.5             | 0.5        | 0.6        |
| M5                                  | M4 + sex                                          | 0.8               | 0.6        | 1.0        | 0.6              | 0.5        | 0.8        | 0.6             | 0.5        | 0.7        |
| <b>M6</b>                           | <b>Main model: M5 + GPS (matched on ventiles)</b> | <b>0.9</b>        | <b>0.7</b> | <b>1.1</b> | <b>0.6</b>       | <b>0.5</b> | <b>0.8</b> | <b>0.7</b>      | <b>0.6</b> | <b>0.8</b> |
| <u>Sensitivity models</u>           |                                                   |                   |            |            |                  |            |            |                 |            |            |
| M7                                  | M5 + GPS (linear term)                            | 0.7               | 0.5        | 0.9        | 0.6              | 0.5        | 0.7        | 0.6             | 0.5        | 0.7        |
| M8                                  | M5 + 4 CPs added as covariates                    | 0.5               | 0.3        | 0.7        | 0.5              | 0.3        | 0.6        | 0.4             | 0.3        | 0.5        |
| M9                                  | M5 + GPS (inverse weights)                        | 0.7               | 0.5        | 0.9        | 0.6              | 0.4        | 0.7        | 0.6             | 0.5        | 0.7        |
| M10                                 | M5 + GPS (matched on percentiles)                 | 1.0               | 0.7        | 1.3        | 0.6              | 0.4        | 0.8        | 0.4             | 0.2        | 0.6        |
| M11                                 | M5 + GPS (matched on deciles)                     | 0.9               | 0.7        | 1.1        | 0.7              | 0.5        | 0.8        | 0.7             | 0.6        | 0.8        |
| M12                                 | M5 + alternative GPS #1                           | 1.0               | 0.7        | 1.2        | 0.9              | 0.7        | 1.0        | 0.7             | 0.6        | 0.8        |
| M13                                 | M5 + alternative GPS #2                           | 1.1               | 0.9        | 1.3        | 0.9              | 0.7        | 1.0        | 0.8             | 0.7        | 0.9        |

**Table S4.** Effect of air pollutants on usage of intensive care units (ICU), main approach and sensitivity analyses: percent increases of risk (%IR), and 95% Confidence Intervals (95% CI), per 1  $\mu\text{g}/\text{m}^3$  increments in air pollutants. Italy, February 20, 2020 – June 15, 2021 (n=3,995,202 COVID-19 cases, n=54,699 accesses to intensive care units)

| Model                               | Description                                       | PM <sub>2.5</sub> |            |            | PM <sub>10</sub> |            |            | NO <sub>2</sub> |            |            |
|-------------------------------------|---------------------------------------------------|-------------------|------------|------------|------------------|------------|------------|-----------------|------------|------------|
|                                     |                                                   | %IR               | 95% CI     |            | %IR              | 95% CI     |            | %IR             | 95% CI     |            |
| <u>Increasing adjustment levels</u> |                                                   |                   |            |            |                  |            |            |                 |            |            |
| M1                                  | Crude                                             | 4.5               | 4.2        | 4.7        | 2.1              | 1.9        | 2.3        | 1.9             | 1.8        | 2.1        |
| M2                                  | M1 + province                                     | 2.0               | 1.5        | 2.6        | 1.5              | 1.2        | 1.9        | 1.9             | 1.6        | 2.1        |
| M3                                  | M2 + month                                        | 2.0               | 1.5        | 2.5        | 1.5              | 1.1        | 1.8        | 1.6             | 1.4        | 1.8        |
| M4                                  | M3 + age                                          | 1.4               | 1.0        | 1.7        | 0.9              | 0.7        | 1.2        | 0.7             | 0.6        | 0.9        |
| M5                                  | M4 + sex                                          | 1.6               | 1.3        | 1.9        | 1.1              | 0.9        | 1.3        | 0.9             | 0.8        | 1.1        |
| <b>M6</b>                           | <b>Main model: M5 + GPS (matched on ventiles)</b> | <b>1.6</b>        | <b>1.3</b> | <b>1.9</b> | <b>1.5</b>       | <b>1.3</b> | <b>1.7</b> | <b>1.0</b>      | <b>0.8</b> | <b>1.1</b> |
| <u>Sensitivity models</u>           |                                                   |                   |            |            |                  |            |            |                 |            |            |
| M7                                  | M5 + GPS (linear term)                            | 1.5               | 1.2        | 1.8        | 1.1              | 0.9        | 1.3        | 0.8             | 0.6        | 0.9        |
| M8                                  | M5 + 4 CPs added as covariates                    | 1.4               | 1.0        | 1.7        | 0.9              | 0.7        | 1.2        | 0.8             | 0.6        | 1.0        |
| M9                                  | M5 + GPS (inverse weights)                        | 1.9               | 1.6        | 2.2        | 1.3              | 1.0        | 1.5        | 1.2             | 1.1        | 1.4        |
| M10                                 | M5 + GPS (matched on percentiles)                 | 1.9               | 1.6        | 2.2        | 2.1              | 1.9        | 2.3        | 1.1             | 0.9        | 1.4        |
| M11                                 | M5 + GPS (matched on deciles)                     | 1.5               | 1.2        | 1.8        | 1.2              | 1.0        | 1.4        | 1.0             | 0.8        | 1.1        |
| M12                                 | M5 + alternative GPS #1                           | 2.2               | 1.9        | 2.5        | 1.7              | 1.6        | 1.9        | 1.0             | 0.9        | 1.2        |
| M13                                 | M5 + alternative GPS #2                           | 2.4               | 2.2        | 2.7        | 1.5              | 1.4        | 1.7        | 1.3             | 1.2        | 1.5        |



**Table S5.** Effect of air pollutants on mortality in the three different waves of the COVID-19 pandemic, by individual-level covariates and geographical area: percent increases of risk (%IR), and 95% Confidence Intervals (95% CI), per 1  $\mu\text{g}/\text{m}^3$  increment in air pollutants. Italy, February 20, 2020 – June 15, 2021 (first wave: n=201,210 COVID-19 cases, n=35,440 deaths; second wave: n=1,534,950 COVID-19 cases, n=41,620 deaths; third wave: n=2,259,042 COVID-19 cases, n=47,286 deaths). Results from the main model, adjusted for interaction terms between month, province, age, sex, and ventiles of the generalized propensity score

First wave: 20/02/2020 – 31/05/2020

|                         | n           | PM <sub>2.5</sub> |        |      | PM <sub>10</sub> |        |      | NO <sub>2</sub> |        |      |     |
|-------------------------|-------------|-------------------|--------|------|------------------|--------|------|-----------------|--------|------|-----|
|                         |             | %IR               | 95% CI |      | %IR              | 95% CI |      | %IR             | 95% CI |      |     |
| All                     | 201,210     | 1.1               | 0.5    | 1.6  | 0.7              | 0.4    | 1.0  | 0.7             | 0.4    | 1.0  |     |
| Age                     | 0-64        | 98,080            | -0.6   | -1.7 | 0.6              | -0.5   | -1.2 | 0.3             | 0.3    | -0.3 | 1.0 |
|                         | 65-74       | 29,920            | 0.3    | -1.1 | 1.7              | 0.4    | -0.5 | 1.2             | 0.4    | -0.3 | 1.2 |
|                         | 75-84       | 38,795            | 1.7    | 0.6  | 2.8              | 1.0    | 0.3  | 1.6             | 1.3    | 0.7  | 1.9 |
|                         | 85+         | 34,415            | 1.9    | 0.6  | 3.2              | 1.3    | 0.5  | 2.1             | 0.4    | -0.3 | 1.1 |
| Sex                     | Female      | 104,197           | 1.0    | 0.2  | 1.9              | 0.9    | 0.4  | 1.4             | 0.7    | 0.2  | 1.2 |
|                         | Male        | 97,013            | 1.1    | 0.4  | 1.9              | 0.6    | 0.1  | 1.0             | 0.7    | 0.3  | 1.1 |
| Clinical state at onset | Symptomatic | 170,894           | 0.9    | 0.3  | 1.5              | 0.5    | 0.1  | 0.8             | 0.5    | 0.2  | 0.8 |
| Geographical area       | Po Valley   | 144,545           | 1.1    | 0.5  | 1.7              | 0.6    | 0.3  | 1.0             | 0.7    | 0.3  | 1.0 |

Second wave: 15/09/2020 – 15/12/2020

|                         | n           | PM <sub>2.5</sub> |        |      | PM <sub>10</sub> |        |      | NO <sub>2</sub> |        |      |     |
|-------------------------|-------------|-------------------|--------|------|------------------|--------|------|-----------------|--------|------|-----|
|                         |             | %IR               | 95% CI |      | %IR              | 95% CI |      | %IR             | 95% CI |      |     |
| All                     | 1,534,950   | 0.1               | -0.4   | 0.5  | 0.1              | -0.2   | 0.4  | 0.6             | 0.4    | 0.8  |     |
| Age                     | 0-64        | 1,225,335         | 0.2    | -0.7 | 1.1              | 0.5    | -0.1 | 1.1             | 1.8    | 1.4  | 2.2 |
|                         | 65-74       | 135,791           | -0.4   | -1.8 | 1.1              | 0.1    | -0.8 | 1.1             | 0.1    | -0.6 | 0.8 |
|                         | 75-84       | 106,744           | -0.8   | -1.9 | 0.3              | -0.3   | -1.1 | 0.4             | 0.4    | -0.2 | 0.9 |
|                         | 85+         | 67,080            | 1.3    | 0.0  | 2.5              | 0.5    | -0.4 | 1.3             | 0.8    | 0.1  | 1.4 |
| Sex                     | Female      | 775,867           | 0.7    | 0.1  | 1.3              | -0.3   | -0.7 | 0.2             | 0.4    | 0.1  | 0.7 |
|                         | Male        | 759,083           | -0.4   | -1.0 | 0.2              | 0.4    | 0.0  | 0.8             | 0.8    | 0.5  | 1.1 |
| Clinical state at onset | Symptomatic | 824,075           | 0.2    | -0.3 | 0.8              | 0.5    | 0.2  | 0.9             | 0.5    | 0.3  | 0.8 |
| Geographical area       | Po Valley   | 759,084           | -0.7   | -1.2 | -0.2             | -0.1   | -0.5 | 0.2             | -0.1   | -0.4 | 0.2 |

Third wave: 16/12/2020 – 15/06/2021

|                         | n           | PM <sub>2.5</sub> |        |      | PM <sub>10</sub> |        |      | NO <sub>2</sub> |        |      |      |
|-------------------------|-------------|-------------------|--------|------|------------------|--------|------|-----------------|--------|------|------|
|                         |             | %IR               | 95% CI |      | %IR              | 95% CI |      | %IR             | 95% CI |      |      |
| All                     | 2,259,042   | 0.9               | 0.6    | 1.3  | 0.3              | 0.0    | 0.5  | 0.7             | 0.5    | 0.8  |      |
| Age                     | 0-64        | 1,849,828         | -1.3   | -1.9 | -0.7             | -1.1   | -1.5 | -0.7            | -0.7   | -1.0 | -0.4 |
|                         | 65-74       | 204,196           | -0.4   | -1.5 | 0.7              | -0.3   | -1.0 | 0.5             | 0.5    | 0.0  | 1.0  |
|                         | 75-84       | 136,988           | 1.7    | 0.6  | 2.8              | 0.6    | -0.1 | 1.3             | 1.1    | 0.6  | 1.6  |
|                         | 85+         | 68,030            | 2.5    | 1.1  | 3.8              | 1.0    | 0.2  | 1.9             | 1.0    | 0.4  | 1.6  |
| Sex                     | Female      | 1,140,988         | 1.0    | 0.4  | 1.5              | 0.6    | 0.3  | 1.0             | 0.6    | 0.4  | 0.9  |
|                         | Male        | 1,118,054         | 0.9    | 0.4  | 1.4              | 0.0    | -0.3 | 0.3             | 0.7    | 0.4  | 0.9  |
| Clinical state at onset | Symptomatic | 1,259,975         | 1.3    | 0.9  | 1.8              | 0.4    | 0.1  | 0.7             | 0.8    | 0.5  | 1.0  |
| Geographical area       | Po Valley   | 984,519           | 0.8    | 0.3  | 1.2              | 0.0    | -0.2 | 0.3             | 0.2    | 0.0  | 0.5  |

**Table S6.** Results of the two-pollutant models: percent increases of risk (%IR), and 95% Confidence Intervals (95% CI), per 1  $\mu\text{g}/\text{m}^3$  increment in air pollutants. Italy, February 20, 2020 – June 15, 2021 (n=3,995,202 COVID-19 cases, n=124,346 deaths). Results from the main model, adjusted for interaction terms between month, province, age, sex, and ventiles of the generalized propensity score

| <b>Exposure</b>         | <b>Model</b>        | <b>%IR</b> | <b>95% CI</b> |     |
|-------------------------|---------------------|------------|---------------|-----|
| <b>PM<sub>2.5</sub></b> | Single              | 0.7        | 0.5           | 0.9 |
|                         | + NO <sub>2</sub>   | -0.4       | -0.7          | 0.0 |
| <b>PM<sub>10</sub></b>  | Single              | 0.3        | 0.2           | 0.5 |
|                         | + NO <sub>2</sub>   | -0.3       | -0.6          | 0.0 |
| <b>NO<sub>2</sub></b>   | Single              | 0.6        | 0.5           | 0.8 |
|                         | + PM <sub>2.5</sub> | 0.9        | 0.7           | 1.0 |
|                         | + PM <sub>10</sub>  | 0.7        | 0.5           | 0.9 |

**Figure S1.** Flow-chart of data selection

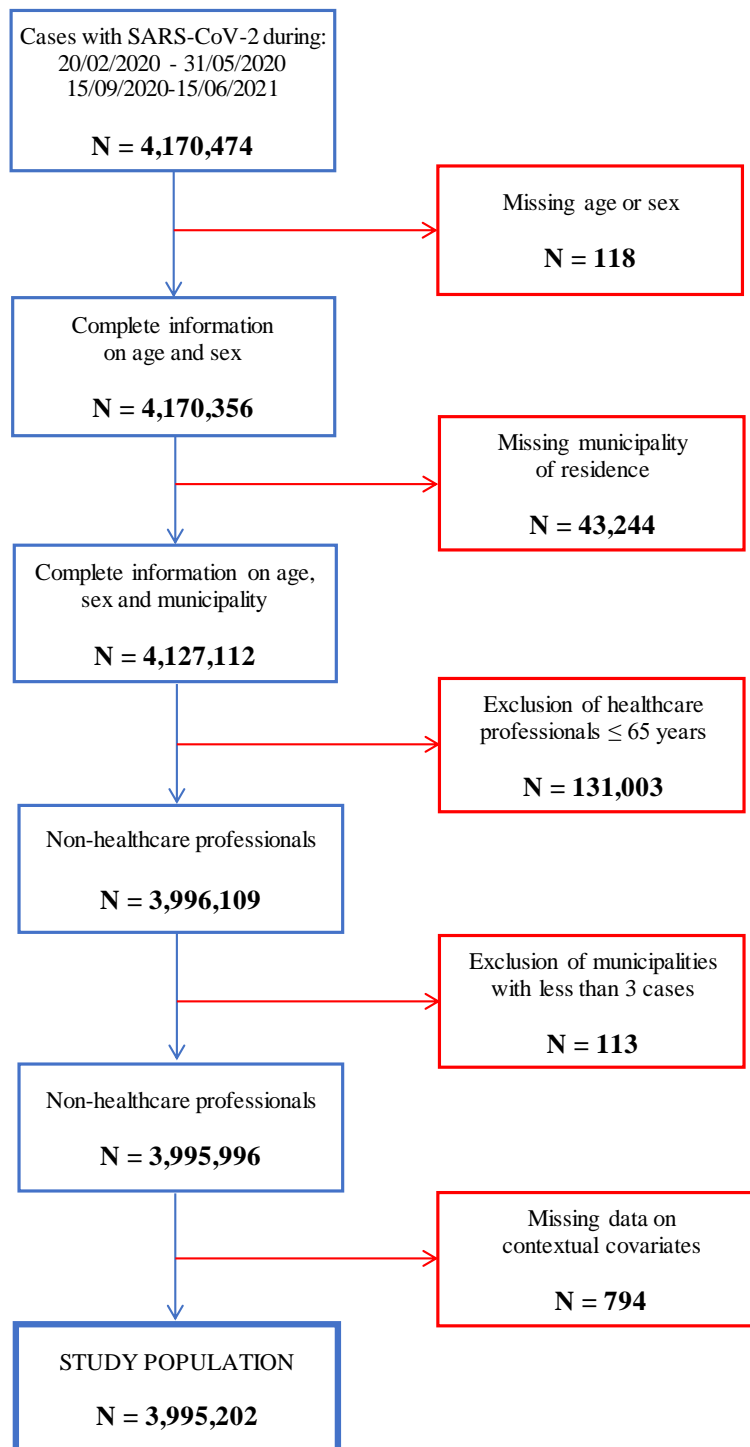

**Figure S2.** Map of COVID-19 case-fatality rates by municipality<sup>a</sup> in the three different pandemic waves: 20/02/2020 – 31/05/2020, 15/09/2020 – 15/12/2020 and 16/12/2020 – 15/06/2021

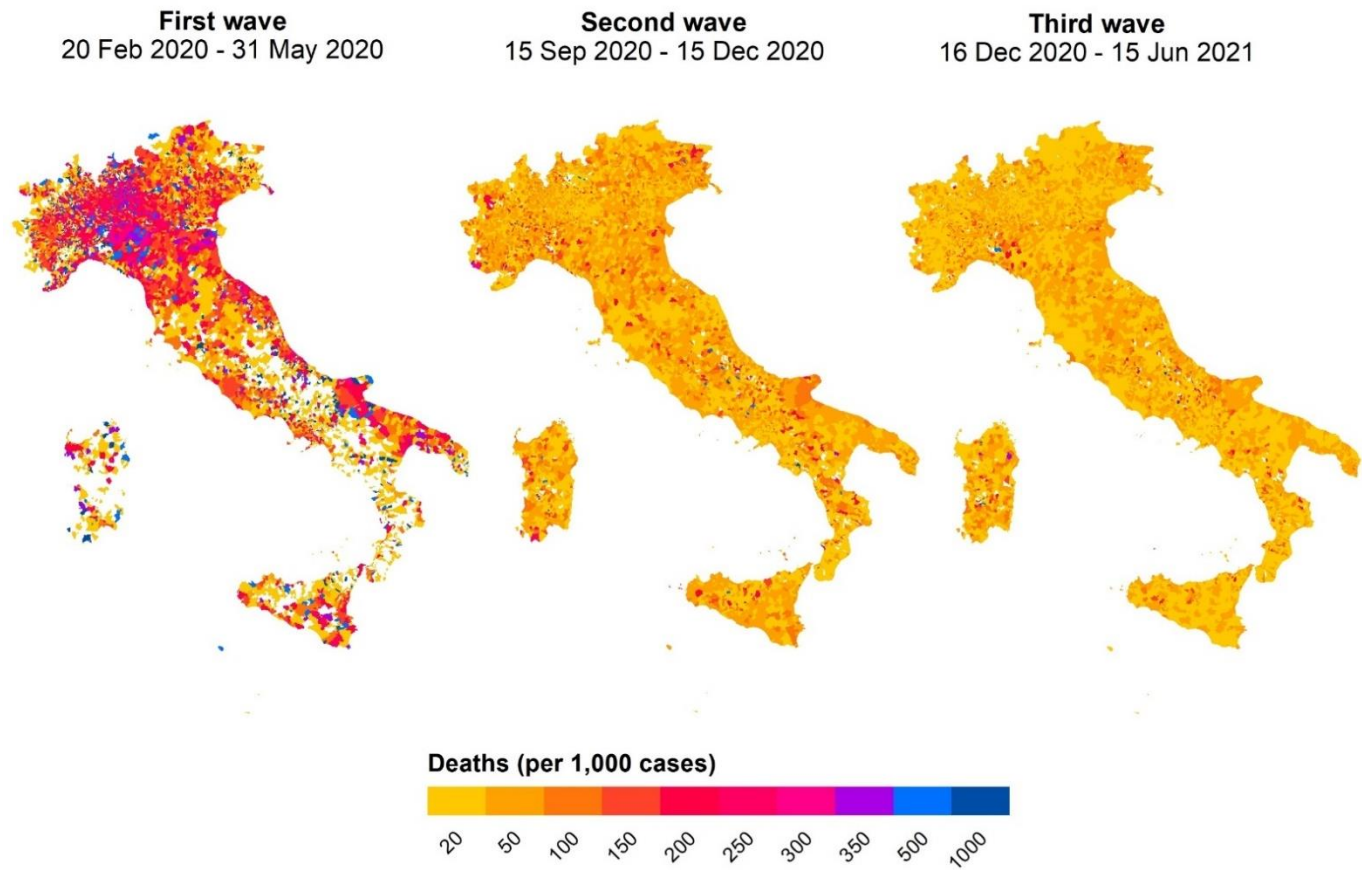

<sup>a</sup> Municipalities with no cases are in white

**Figure S3.** Map of COVID-19 hospitalization rates (left) and usage of intensive care units (ICU) rates (right) by municipality<sup>a</sup>, Italy 20/02/2020 – 31/05/2020 and 15/09/2020 – 15/06/2021

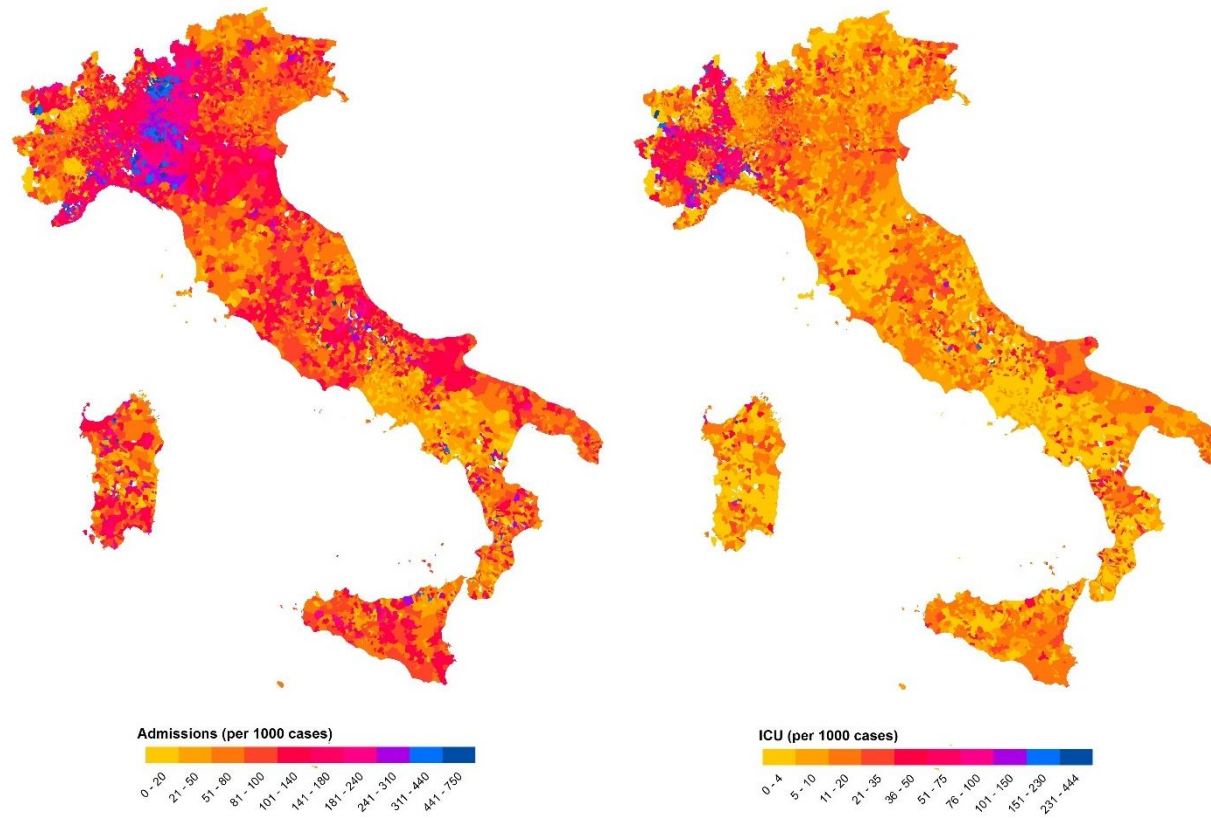

<sup>a</sup> Municipalities with no cases are in white

Figure S4. Map of air pollution levels (mean 2016-2019) by municipality in Italy

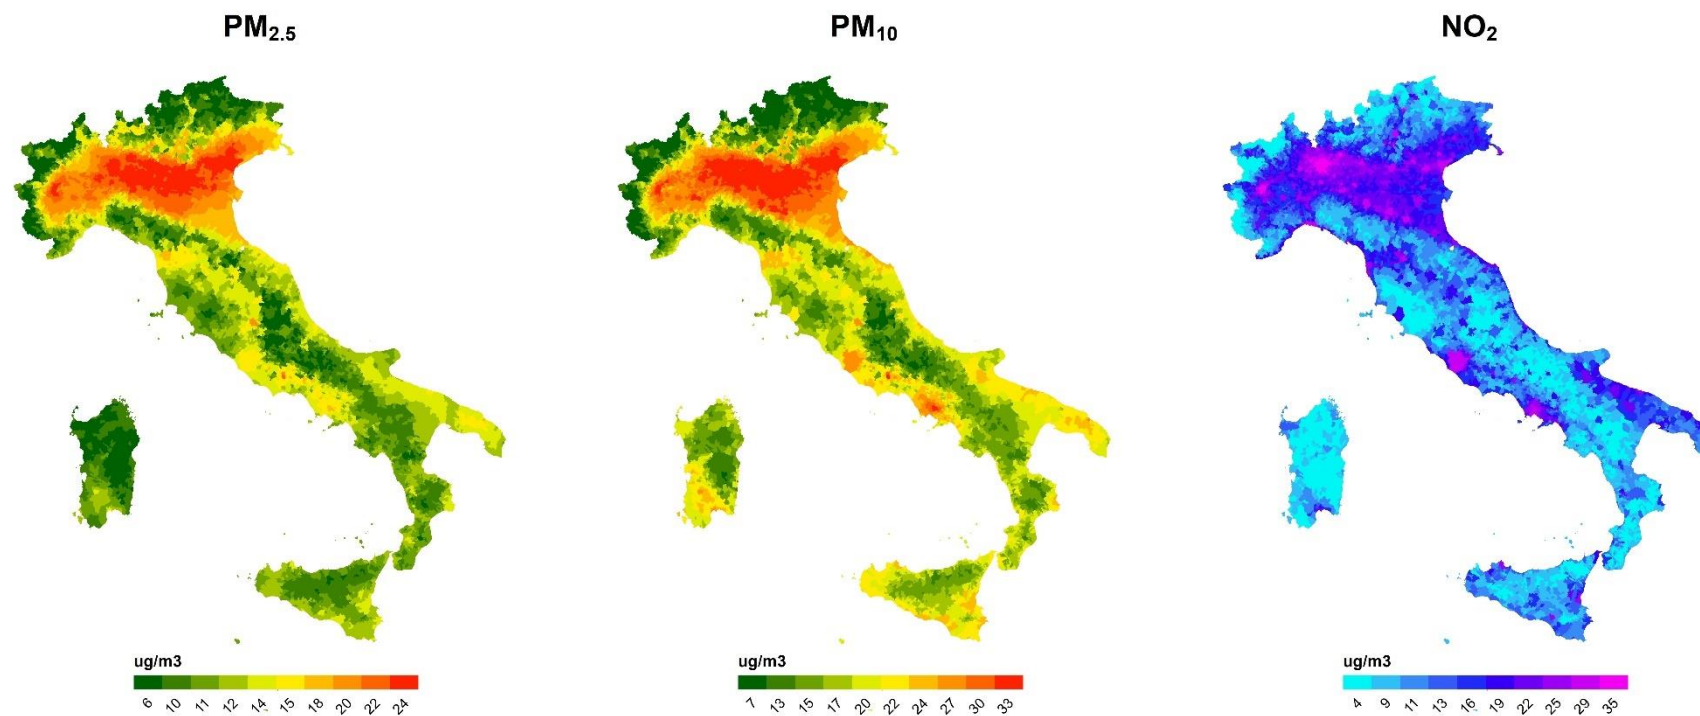

**Figure S5.** Generalized Propensity Score (GPS) based on 4 selected principal components (PC): distribution of GPS by quintiles of exposure (positivity assumption (left) and absolute correlation between exposure and covariates pre- and post-GPS (balancing plot, right). Relevant data on mean absolute correlations in Excel Table S3

PM<sub>2.5</sub>

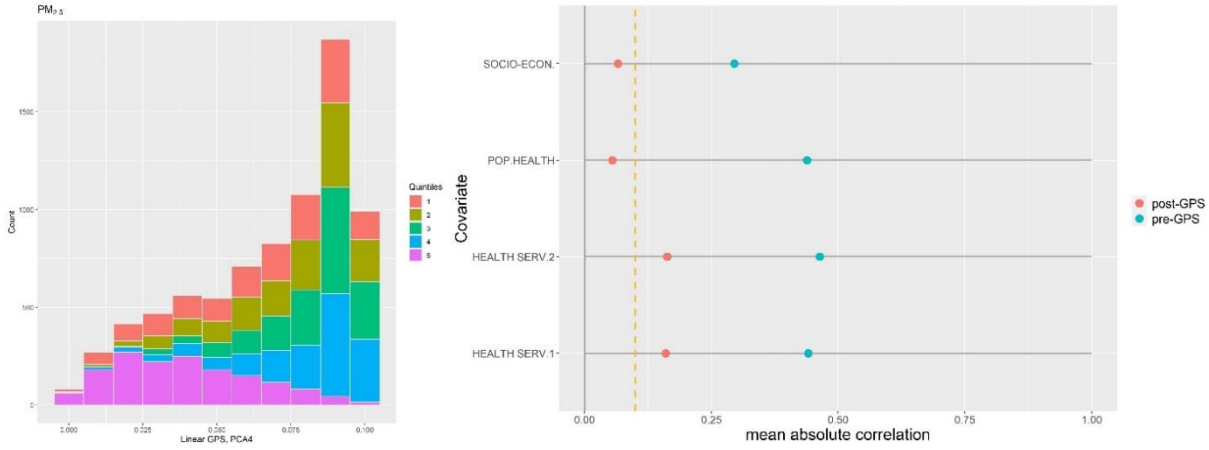

PM<sub>10</sub>

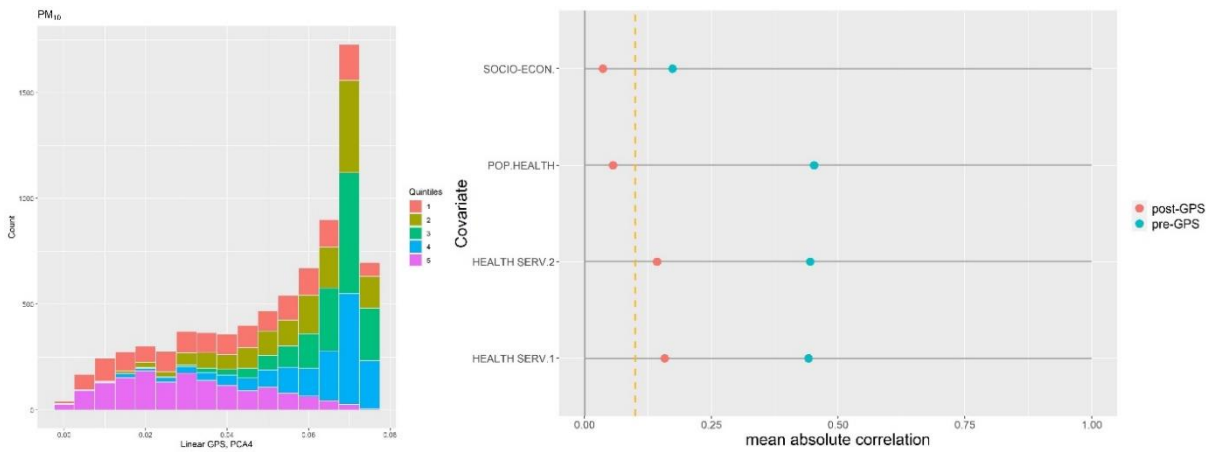

NO<sub>2</sub>

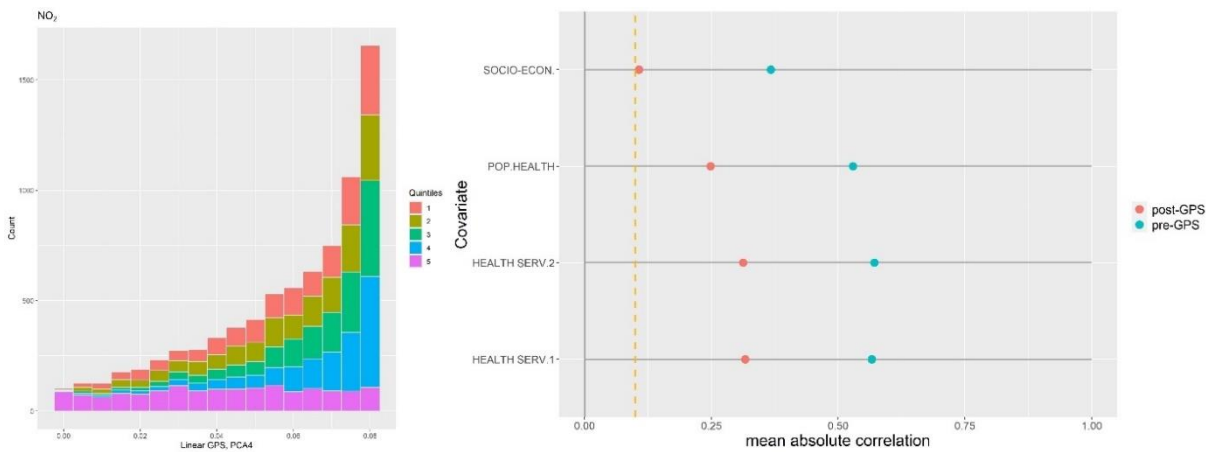

**Figure S6.** Generalized Propensity Score (GPS) based on all 12 principal components (PC): distribution of GPS by quintiles of exposure (positivity assumption (left) and absolute correlation between exposure and covariates pre- and post-GPS (balancing plot, right). Relevant data on mean absolute correlations in Excel Table S4

PM<sub>2.5</sub>

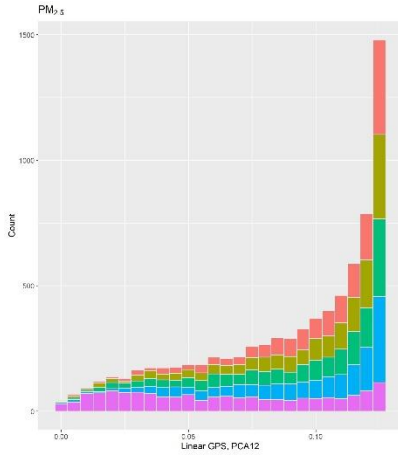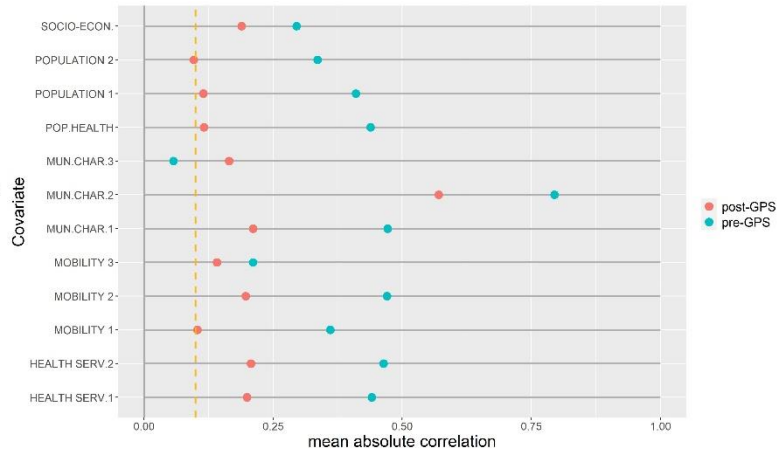

PM<sub>10</sub>

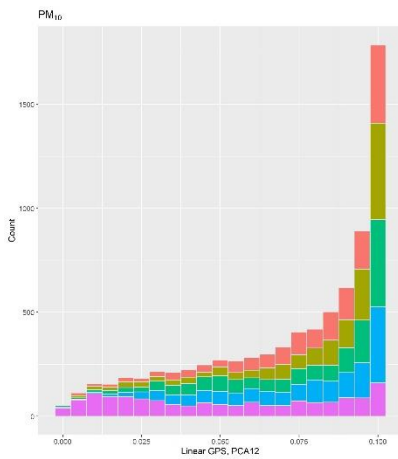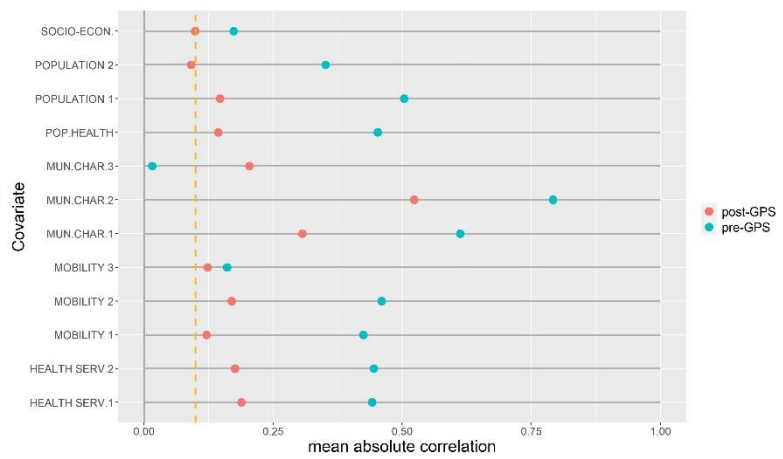

NO<sub>2</sub>

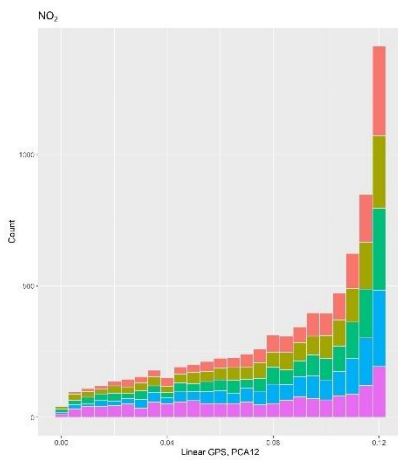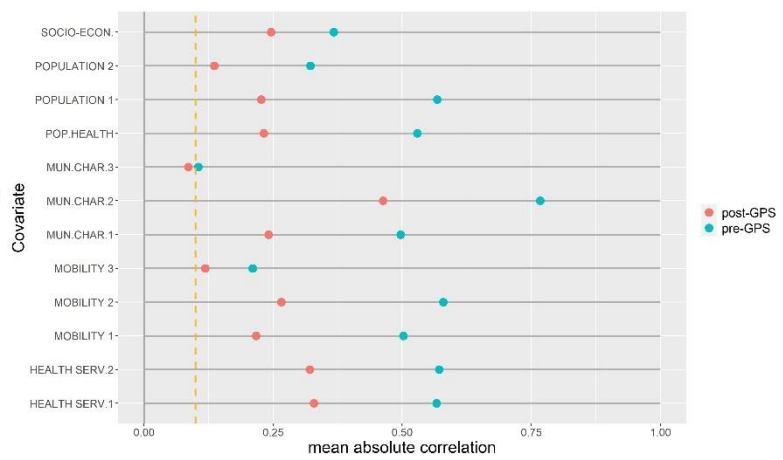



**Figure S7.** Generalized Propensity Score (GPS) based on selected contextual variables: distribution of GPS by quintiles of exposure (positivity assumption (left) and absolute correlation between exposure and covariates pre- and post-GPS (balancing plot, right). Relevant data on mean absolute correlations in Excel Table S5

PM<sub>2.5</sub>

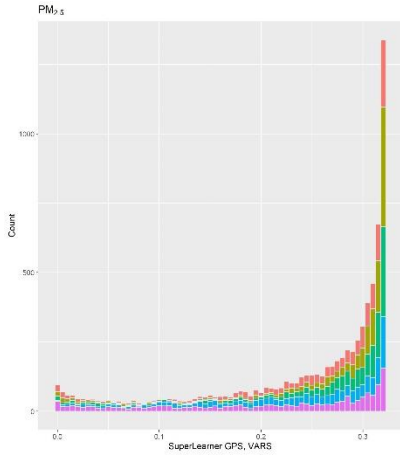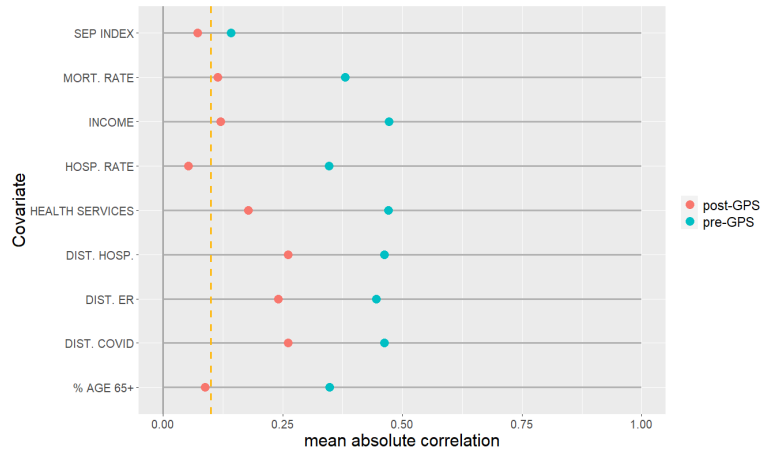

PM<sub>10</sub>

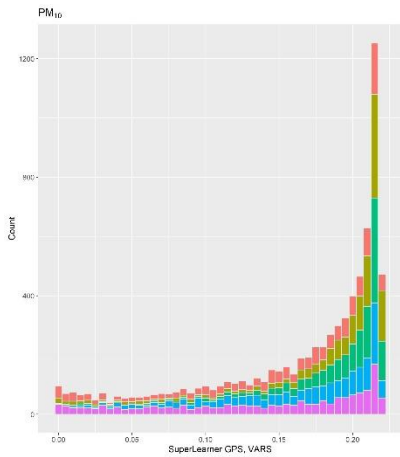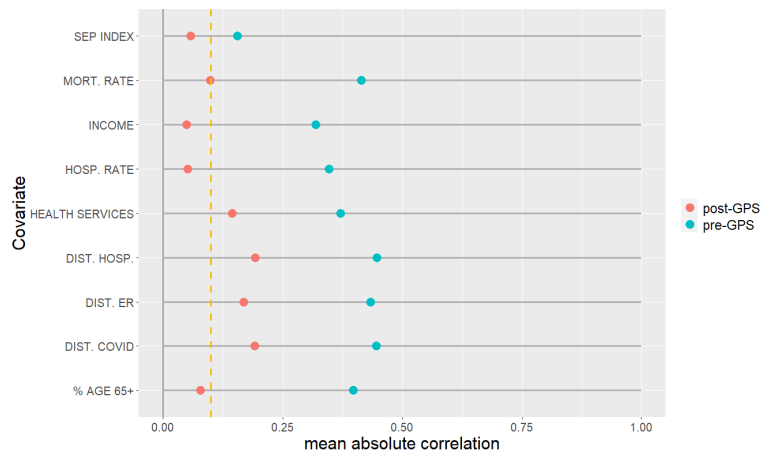

NO<sub>2</sub>

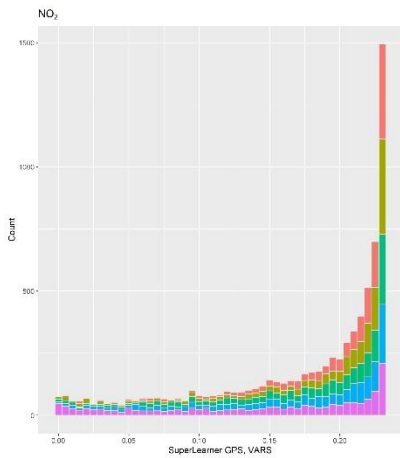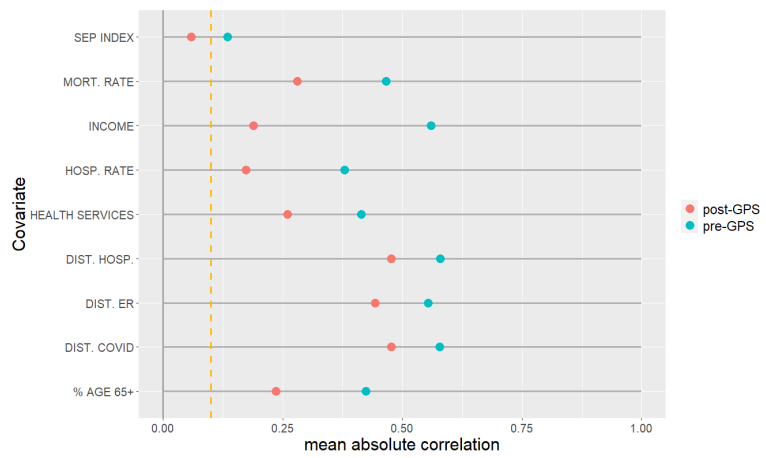

Supplement: ehp11882.s001.acco.pdf [file ehp11882.s001.acco.pdf]
