# Supplementary material
Source: PubMed Central journal article supplement (PMC10174641)
Supplement: ehp11882.smcontents.508.pdf [file ehp11882.smcontents.508.pdf]

**Note to readers with disabilities:** *EHP* strives to ensure that all journal content is accessible to all readers. However, some figures and Supplemental Material published in *EHP* articles may not conform to [508 standards](#) due to the complexity of the information being presented. If you need assistance accessing journal content, please contact [ehp508@niehs.nih.gov](mailto:ehp508@niehs.nih.gov). Our staff will work with you to assess and meet your accessibility needs within 3 working days.

### **Supplemental Material**

#### **Long-Term Exposure to Ambient Air Pollution and Mortality among Four Million COVID-19 Cases in Italy: The EpiCovAir Study**

Massimo Stafoggia, Andrea Ranzi, Carla Ancona, Lisa Bauleo, Antonino Bella, Giorgio Cattani, Federica Nobile, Patrizio Pezzotti, Ivano Iavarone, and the EpiCovAir Study Group

#### **Table of Contents**

##### **The EpiCovAir Study Group**

**Table S1.** Municipality-specific variables on: characteristics of the area, population, mobility, socio-economic and health status, and healthcare offer.

**Table S2.** Effect of air pollutants on mortality with inclusion of healthcare professionals, main approach and sensitivity analyses: percent increase in mortality risk (%IR), and 95% Confidence Intervals (95% CI) per 1  $\mu\text{g}/\text{m}^3$  increment in air pollutants. Italy, February 20, 2020 – June 15, 2021 (n=4,126,189 COVID-19 cases, n=124,522 deaths).

**Table S3.** Effect of air pollutants on hospitalizations, main approach and sensitivity analyses: percent increases of risk (%IR), and 95% Confidence Intervals (95% CI), per 1  $\mu\text{g}/\text{m}^3$  increment in air pollutants. Italy, February 20, 2020 – June 15, 2021 (n=3,995,202 COVID-19 cases, n=391,329 hospitalizations).

**Table S4.** Effect of air pollutants on usage of intensive care units (ICU), main approach and sensitivity analyses: percent increases of risk (%IR), and 95% Confidence Intervals (95% CI), per 1  $\mu\text{g}/\text{m}^3$  increments in air pollutants. Italy, February 20, 2020 – June 15, 2021 (n=3,995,202 COVID-19 cases, n=54,699 accesses to intensive care units).

**Table S5.** Effect of air pollutants on mortality in the three different waves of the COVID-19 pandemic, by individual-level covariates and geographical area: percent increases of risk (%IR), and 95% Confidence Intervals (95% CI), per 1  $\mu\text{g}/\text{m}^3$  increment in air pollutants. Italy, February 20, 2020 – June 15, 2021 (first wave: n=201,210 COVID-19 cases, n=35,440 deaths; second wave: n=1,534,950 COVID-19 cases, n=41,620 deaths; third wave: n=2,259,042 COVID-19 cases, n=47,286 deaths). Results from the main model, adjusted for interaction terms between month, province, age, sex, and ventiles of the generalized propensity score.

**Table S6.** Results of the two-pollutant models: percent increases of risk (%IR), and 95% Confidence Intervals (95% CI), per 1  $\mu\text{g}/\text{m}^3$  increment in air pollutants. Italy, February 20, 2020 – June 15, 2021 (n=3,995,202 COVID-19 cases, n=124,346 deaths). Results from the main model, adjusted for interaction terms between month, province, age, sex, and ventiles of the generalized propensity score.

**Figure S1.** Flow-chart of data selection.

**Figure S2.** Map of COVID-19 case-fatality rates by municipality in the three different pandemic waves: 20/02/2020 – 31/05/2020, 15/09/2020 – 15/12/2020 and 16/12/2020 – 15/06/2021.

**Figure S3.** Map of COVID-19 hospitalization rates (left) and usage of intensive care units (ICU) rates (right) by municipality, Italy 20/02/2020 – 31/05/2020 and 15/09/2020 – 15/06/2021.

**Figure S4.** Map of air pollution levels (mean 2016-2019) by municipality in Italy.

**Figure S5.** Generalized Propensity Score (GPS) based on 4 selected principal components (PC): distribution of GPS by quintiles of exposure (positivity assumption (left) and absolute correlation between exposure and covariates pre- and post-GPS (balancing plot, right). Relevant data on mean absolute correlations in Excel Table S3.

**Figure S6.** Generalized Propensity Score (GPS) based on all 12 principal components (PC): distribution of GPS by quintiles of exposure (positivity assumption (left) and absolute correlation between exposure and covariates pre- and post-GPS (balancing plot, right). Relevant data on mean absolute correlations in Excel Table S4.

**Figure S7.** Generalized Propensity Score (GPS) based on selected contextual variables: distribution of GPS by quintiles of exposure (positivity assumption (left) and absolute correlation between exposure and covariates pre- and post-GPS (balancing plot, right). Relevant data on mean absolute correlations in Excel Table S5.

**Additional File-** Excel Document
